# Supplementary material
Source: PubMed Central journal article supplement (PMC4962701)
Supplement: NIHMS803487-supplement-Supp_Info.pdf [file NIHMS803487-supplement-Supp_Info.pdf]

## Supplementary Material

### Regional Distributions of Brain Glutamate and Glutamine in Normal Subjects

Mohammed Z. Goryawala, PhD, Sulaiman Sheriff, Andrew A. Maudsley, PhD.

*Supplementary Table 1: Mean Regional Metabolite Concentrations for Lobar White Matter Regions*

| WM Lobar Regions | Number of Voxels Summed | Cho/Cr      | Glu/Cr      | Gln/Cr      | Glx/Cr      | NAA/Cr      | Linewidth   | CRLB Glu (%) | CRLB Gln (%) | CRLB Glx (%) |
|------------------|-------------------------|-------------|-------------|-------------|-------------|-------------|-------------|--------------|--------------|--------------|
| Cerebellum       | 110.6 ± 64              | 0.28 ± 0.04 | 0.77 ± 0.12 | 0.34 ± 0.09 | 0.88 ± 0.08 | 0.88 ± 0.13 | 7.83 ± 0.79 | 5.7 ± 1.6    | 17 ± 9       | 3.1 ± 1      |
| L Frontal Lobe   | 271.9 ± 85              | 0.3 ± 0.03  | 1.01 ± 0.15 | 0.43 ± 0.08 | 1.1 ± 0.13  | 1.33 ± 0.09 | 6.93 ± 0.45 | 6.0 ± 5.6    | 17.3 ± 16    | 3.7 ± 3      |
| L Occipital Lobe | 56.7 ± 47               | 0.23 ± 0.03 | 0.98 ± 0.12 | 0.49 ± 0.11 | 1.07 ± 0.1  | 1.34 ± 0.11 | 6.9 ± 0.74  | 6.9 ± 7.1    | 16.2 ± 14    | 4.0 ± 3      |
| L Parietal Lobe  | 165.7 ± 70              | 0.29 ± 0.03 | 1.01 ± 0.13 | 0.45 ± 0.09 | 1.1 ± 0.11  | 1.39 ± 0.1  | 6.37 ± 0.86 | 5.6 ± 2.5    | 15.5 ± 11    | 3.4 ± 1      |
| L Temporal Lobe  | 94.2 ± 29               | 0.31 ± 0.04 | 0.99 ± 0.14 | 0.45 ± 0.11 | 1.07 ± 0.14 | 1.36 ± 0.13 | 6.64 ± 0.68 | 6.6 ± 5.8    | 18.7 ± 18    | 4.2 ± 3      |
| R Frontal Lobe   | 287.9 ± 81              | 0.3 ± 0.03  | 1.01 ± 0.12 | 0.44 ± 0.1  | 1.07 ± 0.13 | 1.33 ± 0.1  | 6.97 ± 0.58 | 4.9 ± 2.2    | 13.9 ± 8     | 3.2 ± 1      |
| R Occipital Lobe | 61.3 ± 38               | 0.23 ± 0.04 | 0.99 ± 0.15 | 0.46 ± 0.17 | 1.08 ± 0.12 | 1.34 ± 0.13 | 6.9 ± 0.78  | 6.4 ± 3.8    | 20.6 ± 24    | 3.9 ± 2      |
| R Parietal Lobe  | 163.9 ± 58              | 0.29 ± 0.04 | 0.95 ± 0.16 | 0.47 ± 0.1  | 1.06 ± 0.12 | 1.39 ± 0.1  | 6.48 ± 0.99 | 6.8 ± 4.5    | 17.2 ± 14    | 4.1 ± 2      |
| R Temporal Lobe  | 70.8 ± 22               | 0.31 ± 0.04 | 0.96 ± 0.17 | 0.45 ± 0.12 | 1.06 ± 0.14 | 1.32 ± 0.13 | 6.88 ± 0.85 | 6.8 ± 3.7    | 19 ± 17      | 3.9 ± 1      |

*Supplementary Table 2: Mean Regional Metabolite Concentrations for Lobar Gray Matter Regions*

| GM Lobar Regions | Number of Voxels Summed | Cho/Cr      | Glu/Cr      | Gln/Cr      | Glx/Cr      | NAA/Cr      | Linewidth   | CRLB Glu (%) | CRLB Gln (%) | CRLB Glx (%) |
|------------------|-------------------------|-------------|-------------|-------------|-------------|-------------|-------------|--------------|--------------|--------------|
| Cerebellum       | 62.7 ± 48               | 0.23 ± 0.03 | 0.72 ± 0.19 | 0.36 ± 0.14 | 0.92 ± 0.14 | 0.78 ± 0.15 | 8.03 ± 0.72 | 10.5 ± 12    | 25.9 ± 23    | 3.8 ± 3      |
| L Frontal Lobe   | 44.0 ± 29               | 0.23 ± 0.04 | 1.12 ± 0.22 | 0.39 ± 0.16 | 1.26 ± 0.12 | 1.18 ± 0.13 | 7.01 ± 1.28 | 9.4 ± 18     | 28.6 ± 27    | 4.9 ± 7      |
| L Occipital Lobe | 21.5 ± 56               | 0.18 ± 0.02 | 1.16 ± 0.21 | 0.4 ± 0.2   | 1.3 ± 0.21  | 1.17 ± 0.19 | 7.46 ± 1    | 7.8 ± 3      | 36.1 ± 27    | 4.2 ± 2      |
| L Parietal Lobe  | 44.7 ± 86               | 0.18 ± 0.02 | 1.14 ± 0.15 | 0.4 ± 0.15  | 1.26 ± 0.16 | 1.17 ± 0.12 | 6.35 ± 0.87 | 7.4 ± 5      | 28.9 ± 26    | 4.5 ± 3      |
| L Temporal Lobe  | 29.9 ± 30               | 0.2 ± 0.02  | 1.11 ± 0.15 | 0.42 ± 0.17 | 1.23 ± 0.18 | 1.14 ± 0.13 | 7.66 ± 0.76 | 6.4 ± 2      | 24.9 ± 19    | 3.3 ± 1      |
| R Frontal Lobe   | 42.5 ± 34               | 0.24 ± 0.03 | 1.19 ± 0.16 | 0.38 ± 0.12 | 1.25 ± 0.17 | 1.15 ± 0.1  | 6.92 ± 0.89 | 6.3 ± 5      | 25.6 ± 22    | 3.7 ± 3      |
| R Occipital Lobe | 14.7 ± 43               | 0.17 ± 0.03 | 1.25 ± 0.37 | 0.33 ± 0.28 | 1.41 ± 0.37 | 1.18 ± 0.22 | 7.52 ± 1.81 | 13.4 ± 11    | 39.1 ± 39    | 6.0 ± 3      |
| R Parietal Lobe  | 39.3 ± 67               | 0.18 ± 0.02 | 1.14 ± 0.22 | 0.4 ± 0.1   | 1.27 ± 0.18 | 1.19 ± 0.12 | 6.4 ± 0.87  | 7.4 ± 7      | 25 ± 21      | 3.8 ± 2      |
| R Temporal Lobe  | 20.2 ± 16               | 0.22 ± 0.03 | 1.05 ± 0.22 | 0.41 ± 0.17 | 1.2 ± 0.25  | 1.12 ± 0.14 | 7.93 ± 0.89 | 8.4 ± 4      | 33 ± 26      | 4.0 ± 2      |

Supplementary Table 3: Mean Regional Metabolite Concentrations for the AAL Atlas Regions

| AAL Atlas Region      | Number of Voxels Summed | Cho/Cr      | Glu/Cr      | Gln/Cr      | Glx/Cr      | NAA/Cr      | Linewidth   | CRLB Glu (%) | CRLB Gln (%) | CRLB Glx (%) |
|-----------------------|-------------------------|-------------|-------------|-------------|-------------|-------------|-------------|--------------|--------------|--------------|
| Calcarine L           | 66.0 ± 19               | 0.19 ± 0.03 | 1.01 ± 0.14 | 0.43 ± 0.11 | 1.1 ± 0.13  | 1.29 ± 0.09 | 6.55 ± 0.86 | 5.9 ± 3      | 16.8 ± 10    | 3.8 ± 2      |
| Calcarine R           | 64.4 ± 21               | 0.17 ± 0.03 | 1.03 ± 0.13 | 0.4 ± 0.13  | 1.1 ± 0.11  | 1.27 ± 0.13 | 6.61 ± 0.87 | 6.4 ± 4      | 23.2 ± 26    | 4.2 ± 2      |
| Caudate L             | 12.1 ± 7                | 0.31 ± 0.05 | 0.92 ± 0.2  | 0.46 ± 0.17 | 1.11 ± 0.17 | 1.24 ± 0.13 | 7.09 ± 0.9  | 14 ± 18      | 28.6 ± 18    | 6.9 ± 8      |
| Caudate R             | 13.1 ± 7                | 0.31 ± 0.04 | 0.89 ± 0.22 | 0.47 ± 0.15 | 1.06 ± 0.17 | 1.25 ± 0.16 | 7.08 ± 0.84 | 13.9 ± 19    | 26.5 ± 24    | 5.3 ± 3      |
| Cerebellum            | 395.5 ± 221             | 0.21 ± 0.02 | 0.78 ± 0.1  | 0.35 ± 0.07 | 0.91 ± 0.09 | 0.83 ± 0.1  | 7.1 ± 0.71  | 5.4 ± 2      | 14.7 ± 7     | 2.9 ± 1      |
| Anterior Cingulum L   | 20.3 ± 17               | 0.31 ± 0.07 | 1.04 ± 0.36 | 0.35 ± 0.21 | 1.19 ± 0.33 | 1.15 ± 0.2  | 7.28 ± 1.01 | 12.8 ± 11    | 32.9 ± 34    | 8 ± 7        |
| Anterior Cingulum R   | 18.6 ± 15               | 0.3 ± 0.05  | 1.07 ± 0.24 | 0.37 ± 0.18 | 1.2 ± 0.27  | 1.15 ± 0.15 | 6.82 ± 0.95 | 10.8 ± 6     | 32.9 ± 30    | 6.5 ± 4      |
| Middle Cingulum L     | 78.1 ± 19               | 0.23 ± 0.03 | 1.13 ± 0.13 | 0.39 ± 0.12 | 1.2 ± 0.14  | 1.21 ± 0.1  | 6.29 ± 0.64 | 6.9 ± 8      | 22.7 ± 22    | 4.7 ± 5      |
| Middle Cingulum R     | 68.1 ± 16               | 0.23 ± 0.03 | 1.16 ± 0.13 | 0.41 ± 0.07 | 1.2 ± 0.11  | 1.23 ± 0.1  | 6.31 ± 0.82 | 6.1 ± 5      | 21.2 ± 20    | 4.5 ± 5      |
| Posterior Cingulum L  | 15.4 ± 4                | 0.22 ± 0.03 | 1.15 ± 0.17 | 0.38 ± 0.16 | 1.27 ± 0.17 | 1.32 ± 0.13 | 6.13 ± 0.86 | 6.9 ± 2      | 29.4 ± 23    | 4.3 ± 2      |
| Posterior Cingulum R  | 20.5 ± 5                | 0.21 ± 0.03 | 1.11 ± 0.2  | 0.47 ± 0.16 | 1.22 ± 0.2  | 1.28 ± 0.1  | 6.15 ± 0.97 | 6.9 ± 4      | 22.5 ± 20    | 4.3 ± 2      |
| Cuneus L              | 33.4 ± 13               | 0.17 ± 0.03 | 1.05 ± 0.14 | 0.41 ± 0.13 | 1.13 ± 0.13 | 1.26 ± 0.12 | 6.86 ± 1.08 | 7.4 ± 4      | 23.4 ± 14    | 4.7 ± 3      |
| Cuneus R              | 31.7 ± 13               | 0.16 ± 0.03 | 1.06 ± 0.2  | 0.39 ± 0.18 | 1.16 ± 0.18 | 1.25 ± 0.14 | 6.88 ± 1.24 | 9.2 ± 14     | 30.8 ± 31    | 4.6 ± 4      |
| Frontal L             | 191.2 ± 115             | 0.23 ± 0.02 | 1.14 ± 0.14 | 0.44 ± 0.1  | 1.2 ± 0.14  | 1.26 ± 0.13 | 7.03 ± 0.73 | 5.7 ± 2      | 18.7 ± 11    | 3.9 ± 2      |
| Frontal R             | 211.5 ± 115             | 0.23 ± 0.02 | 1.15 ± 0.12 | 0.43 ± 0.09 | 1.2 ± 0.16  | 1.23 ± 0.12 | 7.12 ± 0.8  | 5.2 ± 2      | 17.7 ± 12    | 3.6 ± 2      |
| Fusiform L            | 53.9 ± 22               | 0.22 ± 0.04 | 0.97 ± 0.1  | 0.42 ± 0.12 | 1.06 ± 0.1  | 1.15 ± 0.14 | 7.07 ± 0.71 | 5.8 ± 2      | 18.3 ± 14    | 3.4 ± 1      |
| Fusiform R            | 46.9 ± 21               | 0.23 ± 0.03 | 0.99 ± 0.15 | 0.38 ± 0.1  | 1.06 ± 0.15 | 1.13 ± 0.16 | 7.2 ± 0.73  | 6 ± 3        | 20.4 ± 18    | 3.6 ± 1      |
| Hippocampus L         | 18.8 ± 10               | 0.32 ± 0.04 | 0.95 ± 0.2  | 0.39 ± 0.15 | 1.05 ± 0.21 | 1.1 ± 0.16  | 7.23 ± 0.72 | 8.9 ± 5      | 27.3 ± 18    | 5.3 ± 4      |
| Hippocampus R         | 16.2 ± 8                | 0.32 ± 0.04 | 0.91 ± 0.14 | 0.4 ± 0.15  | 0.99 ± 0.15 | 1.13 ± 0.15 | 7.35 ± 1.05 | 8 ± 3        | 24.1 ± 18    | 4.7 ± 2      |
| Insula L              | 53.9 ± 18               | 0.27 ± 0.03 | 1.16 ± 0.13 | 0.43 ± 0.11 | 1.2 ± 0.13  | 1.23 ± 0.12 | 6.7 ± 0.92  | 5.1 ± 2      | 16 ± 5       | 3.4 ± 2      |
| Insula R              | 60.3 ± 25               | 0.27 ± 0.03 | 1.06 ± 0.13 | 0.39 ± 0.1  | 1.12 ± 0.15 | 1.25 ± 0.13 | 6.96 ± 1.18 | 6.1 ± 4      | 20.9 ± 16    | 3.7 ± 2      |
| Lingual L             | 80.3 ± 23               | 0.18 ± 0.03 | 1.01 ± 0.1  | 0.43 ± 0.1  | 1.12 ± 0.1  | 1.22 ± 0.11 | 6.58 ± 0.72 | 5.2 ± 2      | 17.1 ± 18    | 3.3 ± 1      |
| Lingual R             | 74 ± 23                 | 0.18 ± 0.02 | 1 ± 0.12    | 0.41 ± 0.09 | 1.07 ± 0.12 | 1.18 ± 0.14 | 6.64 ± 0.72 | 5.8 ± 3      | 16.4 ± 9     | 3.8 ± 2      |
| Occipital L           | 76 ± 41                 | 0.19 ± 0.02 | 1.1 ± 0.12  | 0.39 ± 0.13 | 1.15 ± 0.13 | 1.25 ± 0.13 | 7.1 ± 0.81  | 5.9 ± 5      | 21.4 ± 19    | 3.9 ± 3      |
| Occipital R           | 84.2 ± 38               | 0.19 ± 0.02 | 1.08 ± 0.11 | 0.37 ± 0.12 | 1.14 ± 0.12 | 1.28 ± 0.13 | 7.26 ± 0.8  | 6.8 ± 7      | 25.2 ± 25    | 3.8 ± 3      |
| Pallidum L            | 4.1 ± 4                 | 0.25 ± 0.05 | 0.89 ± 0.13 | 0.32 ± 0.24 | 1.01 ± 0.12 | 1.14 ± 0.11 | 7.71 ± 0.88 | 13.6 ± 12    | 37.5 ± 34    | 6 ± 3        |
| Pallidum R            | 4.3 ± 4                 | 0.26 ± 0.05 | 0.81 ± 0.23 | 0.38 ± 0.2  | 1.01 ± 0.16 | 1.21 ± 0.15 | 7.69 ± 0.9  | 14.9 ± 20    | 36.2 ± 22    | 5.6 ± 2      |
| Paracentral Lobule L  | 7.2 ± 4                 | 0.19 ± 0.05 | 1.47 ± 0.51 | 0.44 ± 0.29 | 1.72 ± 1.42 | 1.43 ± 0.34 | 6.81 ± 1.34 | 13.6 ± 15    | 39.1 ± 34    | 8.5 ± 10     |
| Paracentral Lobule R  | 11.5 ± 8                | 0.17 ± 0.04 | 1.47 ± 0.71 | 0.65 ± 0.43 | 1.81 ± 0.69 | 1.53 ± 0.25 | 7.32 ± 1.34 | 11.6 ± 8     | 36.7 ± 27    | 5.1 ± 2      |
| Parietal L            | 104.8 ± 57              | 0.2 ± 0.02  | 1.12 ± 0.16 | 0.38 ± 0.12 | 1.19 ± 0.16 | 1.24 ± 0.13 | 6.72 ± 0.86 | 6.2 ± 4      | 25.7 ± 23    | 4 ± 3        |
| Parietal R            | 113 ± 61                | 0.2 ± 0.02  | 1.08 ± 0.18 | 0.36 ± 0.13 | 1.15 ± 0.17 | 1.25 ± 0.13 | 6.92 ± 0.92 | 6.4 ± 4      | 28.7 ± 29    | 4.2 ± 3      |
| Postcentral L         | 50 ± 26                 | 0.2 ± 0.02  | 1.15 ± 0.23 | 0.48 ± 0.12 | 1.19 ± 0.2  | 1.3 ± 0.16  | 7.03 ± 0.81 | 7.3 ± 7      | 20.6 ± 16    | 4.3 ± 4      |
| Postcentral R         | 53.8 ± 32               | 0.2 ± 0.02  | 1.11 ± 0.18 | 0.47 ± 0.18 | 1.17 ± 0.2  | 1.29 ± 0.15 | 7.09 ± 1.01 | 6.6 ± 4      | 22 ± 21      | 4.3 ± 3      |
| Precentral L          | 38.8 ± 25               | 0.2 ± 0.02  | 1.13 ± 0.24 | 0.43 ± 0.14 | 1.27 ± 0.23 | 1.35 ± 0.18 | 7.1 ± 0.88  | 7.7 ± 6      | 25.5 ± 21    | 4.5 ± 3      |
| Precentral R          | 46 ± 31                 | 0.21 ± 0.02 | 1.16 ± 0.23 | 0.43 ± 0.2  | 1.25 ± 0.35 | 1.39 ± 0.38 | 7.16 ± 1.06 | 8.5 ± 11     | 28.2 ± 26    | 4.6 ± 3      |
| Precuneus L           | 85.8 ± 22               | 0.19 ± 0.03 | 1.08 ± 0.16 | 0.4 ± 0.14  | 1.18 ± 0.16 | 1.26 ± 0.11 | 6.22 ± 0.91 | 6.4 ± 4      | 23.7 ± 24    | 3.9 ± 2      |
| Precuneus R           | 79.4 ± 21               | 0.18 ± 0.03 | 1.09 ± 0.17 | 0.39 ± 0.1  | 1.18 ± 0.19 | 1.25 ± 0.08 | 6.37 ± 0.84 | 6.5 ± 4      | 22.8 ± 17    | 4.3 ± 3      |
| Putamen L             | 28.2 ± 13               | 0.27 ± 0.03 | 0.92 ± 0.16 | 0.39 ± 0.1  | 1.06 ± 0.11 | 1.16 ± 0.11 | 7.12 ± 0.83 | 8.9 ± 9      | 24 ± 17      | 4.2 ± 2      |
| Putamen R             | 25.9 ± 13               | 0.28 ± 0.08 | 1.1 ± 1.03  | 0.6 ± 1     | 1.34 ± 1.57 | 1.11 ± 0.24 | 7.45 ± 1.27 | 8.3 ± 5      | 22.2 ± 14    | 4.2 ± 2      |
| Rolandic Operculum L  | 48.4 ± 13               | 0.23 ± 0.03 | 1.18 ± 0.14 | 0.45 ± 0.14 | 1.22 ± 0.18 | 1.3 ± 0.13  | 6.73 ± 1    | 4.8 ± 2      | 17.5 ± 18    | 3.3 ± 2      |
| Rolandic Operculum R  | 37.6 ± 12               | 0.24 ± 0.03 | 1.1 ± 0.14  | 0.41 ± 0.11 | 1.14 ± 0.15 | 1.3 ± 0.12  | 6.66 ± 1.01 | 5.2 ± 2      | 17.1 ± 8     | 3.5 ± 1      |
| Superior Motor Area L | 26.6 ± 21               | 0.21 ± 0.05 | 1.31 ± 0.35 | 0.4 ± 0.24  | 1.46 ± 0.29 | 1.36 ± 0.23 | 6.94 ± 1    | 10.4 ± 7     | 37.1 ± 34    | 6.3 ± 4      |
| Superior Motor Area R | 19.9 ± 16               | 0.23 ± 0.04 | 1.21 ± 0.24 | 0.58 ± 0.3  | 1.34 ± 0.3  | 1.33 ± 0.22 | 6.93 ± 1.16 | 9.5 ± 5      | 27.7 ± 19    | 6.1 ± 4      |
| Temporal L            | 198.4 ± 76              | 0.22 ± 0.02 | 1.11 ± 0.1  | 0.37 ± 0.08 | 1.18 ± 0.11 | 1.23 ± 0.12 | 7.03 ± 0.68 | 4.6 ± 1      | 17.5 ± 7     | 3 ± 1        |
| Temporal R            | 160 ± 71                | 0.23 ± 0.02 | 1.08 ± 0.14 | 0.38 ± 0.08 | 1.16 ± 0.14 | 1.22 ± 0.1  | 7.21 ± 0.78 | 5.1 ± 2      | 18.3 ± 8     | 3.2 ± 1      |
| Thalamus L            | 29.3 ± 12               | 0.29 ± 0.04 | 0.99 ± 0.14 | 0.38 ± 0.17 | 1.09 ± 0.14 | 1.16 ± 0.12 | 7.3 ± 0.87  | 10.2 ± 13    | 30.6 ± 26    | 6.3 ± 8      |
| Thalamus R            | 30.3 ± 12               | 0.29 ± 0.04 | 0.97 ± 0.15 | 0.37 ± 0.15 | 1.04 ± 0.14 | 1.19 ± 0.08 | 7.2 ± 0.97  | 8.5 ± 4      | 31 ± 22      | 5 ± 2        |

Supplementary Table 4: Mean Regional Improvement in Spectral Fitting of Glx for the AAL Atlas.

| AAL Atlas Region      | Mean CRLB of Glx for Spectral Fitting of Integrated Spectra (%) (A) | Mean CRLB of Glx for Spectral Fitting of Individual Spectra (%) (B) | Improvement Factor (IF) (B/A) | Glx/Cr from Spectral Fitting of Integrated Spectra Mean $\pm$ Std. Dev. (C) | Glx/Cr from Spectral Fitting of Individual Spectra Mean $\pm$ Std. Dev. (D) | %Difference ((C-D)/C) *100 |
|-----------------------|---------------------------------------------------------------------|---------------------------------------------------------------------|-------------------------------|-----------------------------------------------------------------------------|-----------------------------------------------------------------------------|----------------------------|
| Calcarine L           | 3.8                                                                 | 13.9                                                                | 3.66                          | 1.1 $\pm$ 0.13                                                              | 0.87 $\pm$ 0.1                                                              | 21.03                      |
| Calcarine R           | 4.2                                                                 | 15.4                                                                | 3.67                          | 1.1 $\pm$ 0.11                                                              | 0.82 $\pm$ 0.12                                                             | 25.69                      |
| Caudate L             | 6.9                                                                 | 22.5                                                                | 3.26                          | 1.11 $\pm$ 0.17                                                             | 0.96 $\pm$ 0.57                                                             | 13.27                      |
| Caudate R             | 5.3                                                                 | 21.1                                                                | 3.98                          | 1.06 $\pm$ 0.17                                                             | 0.92 $\pm$ 0.4                                                              | 13.24                      |
| Cerebellum            | 2.9                                                                 | 12.3                                                                | 4.24                          | 0.91 $\pm$ 0.09                                                             | 0.73 $\pm$ 0.06                                                             | 20.17                      |
| Anterior Cingulum L   | 8                                                                   | 21.9                                                                | 2.74                          | 1.19 $\pm$ 0.33                                                             | 0.92 $\pm$ 0.17                                                             | 22.31                      |
| Anterior Cingulum R   | 6.5                                                                 | 19                                                                  | 2.92                          | 1.2 $\pm$ 0.27                                                              | 0.97 $\pm$ 0.16                                                             | 19.52                      |
| Middle Cingulum L     | 4.7                                                                 | 18                                                                  | 3.83                          | 1.2 $\pm$ 0.14                                                              | 0.92 $\pm$ 0.13                                                             | 22.82                      |
| Middle Cingulum R     | 4.5                                                                 | 16.9                                                                | 3.76                          | 1.2 $\pm$ 0.11                                                              | 0.95 $\pm$ 0.1                                                              | 20.80                      |
| Posterior Cingulum L  | 4.3                                                                 | 15.3                                                                | 3.56                          | 1.27 $\pm$ 0.17                                                             | 0.89 $\pm$ 0.17                                                             | 29.89                      |
| Posterior Cingulum R  | 4.3                                                                 | 14.1                                                                | 3.28                          | 1.22 $\pm$ 0.2                                                              | 0.92 $\pm$ 0.15                                                             | 24.99                      |
| Cuneus L              | 4.7                                                                 | 17.7                                                                | 3.77                          | 1.13 $\pm$ 0.13                                                             | 0.8 $\pm$ 0.15                                                              | 29.26                      |
| Cuneus R              | 4.6                                                                 | 16.5                                                                | 3.59                          | 1.16 $\pm$ 0.18                                                             | 0.84 $\pm$ 0.18                                                             | 27.93                      |
| Frontal L             | 3.9                                                                 | 24.4                                                                | 6.26                          | 1.2 $\pm$ 0.14                                                              | 0.99 $\pm$ 0.31                                                             | 18.06                      |
| Frontal R             | 3.6                                                                 | 20.4                                                                | 5.67                          | 1.2 $\pm$ 0.16                                                              | 0.97 $\pm$ 0.25                                                             | 18.55                      |
| Fusiform L            | 3.4                                                                 | 13.7                                                                | 4.03                          | 1.06 $\pm$ 0.1                                                              | 0.81 $\pm$ 0.16                                                             | 23.96                      |
| Fusiform R            | 3.6                                                                 | 12.9                                                                | 3.58                          | 1.06 $\pm$ 0.15                                                             | 0.78 $\pm$ 0.17                                                             | 26.78                      |
| Hippocampus L         | 5.3                                                                 | 16                                                                  | 3.02                          | 1.05 $\pm$ 0.21                                                             | 0.86 $\pm$ 0.18                                                             | 18.38                      |
| Hippocampus R         | 4.7                                                                 | 16.6                                                                | 3.53                          | 0.99 $\pm$ 0.15                                                             | 0.77 $\pm$ 0.25                                                             | 22.28                      |
| Insula L              | 3.4                                                                 | 14                                                                  | 4.12                          | 1.2 $\pm$ 0.13                                                              | 0.91 $\pm$ 0.14                                                             | 24.31                      |
| Insula R              | 3.7                                                                 | 14.6                                                                | 3.95                          | 1.12 $\pm$ 0.15                                                             | 0.95 $\pm$ 0.49                                                             | 15.44                      |
| Lingual L             | 3.3                                                                 | 14.7                                                                | 4.45                          | 1.12 $\pm$ 0.1                                                              | 0.86 $\pm$ 0.16                                                             | 23.48                      |
| Lingual R             | 3.8                                                                 | 13.6                                                                | 3.58                          | 1.07 $\pm$ 0.12                                                             | 0.8 $\pm$ 0.14                                                              | 25.45                      |
| Occipital L           | 3.9                                                                 | 16.3                                                                | 4.18                          | 1.15 $\pm$ 0.13                                                             | 0.89 $\pm$ 0.11                                                             | 22.98                      |
| Occipital R           | 3.8                                                                 | 14.4                                                                | 3.79                          | 1.14 $\pm$ 0.12                                                             | 0.87 $\pm$ 0.11                                                             | 24.29                      |
| Pallidum L            | 6                                                                   | 13.1                                                                | 2.18                          | 1.01 $\pm$ 0.12                                                             | 0.83 $\pm$ 0.29                                                             | 18.57                      |
| Pallidum R            | 5.6                                                                 | 14.8                                                                | 2.64                          | 1.01 $\pm$ 0.16                                                             | 0.67 $\pm$ 0.15                                                             | 34.25                      |
| Paracentral Lobule L  | 8.5                                                                 | 21.1                                                                | 2.48                          | 1.72 $\pm$ 1.42                                                             | 1.17 $\pm$ 0.35                                                             | 31.88                      |
| Paracentral Lobule R  | 5.1                                                                 | 19.3                                                                | 3.78                          | 1.81 $\pm$ 0.69                                                             | 1.2 $\pm$ 0.55                                                              | 33.64                      |
| Parietal L            | 4                                                                   | 15.6                                                                | 3.9                           | 1.19 $\pm$ 0.16                                                             | 0.94 $\pm$ 0.09                                                             | 21.04                      |
| Parietal R            | 4.2                                                                 | 15.9                                                                | 3.79                          | 1.15 $\pm$ 0.17                                                             | 0.91 $\pm$ 0.13                                                             | 20.98                      |
| Postcentral L         | 4.3                                                                 | 18.5                                                                | 4.3                           | 1.19 $\pm$ 0.2                                                              | 0.89 $\pm$ 0.15                                                             | 25.05                      |
| Postcentral R         | 4.3                                                                 | 15.4                                                                | 3.58                          | 1.17 $\pm$ 0.2                                                              | 0.88 $\pm$ 0.16                                                             | 24.96                      |
| Precentral L          | 4.5                                                                 | 19                                                                  | 4.22                          | 1.27 $\pm$ 0.23                                                             | 0.96 $\pm$ 0.2                                                              | 24.25                      |
| Precentral R          | 4.6                                                                 | 16.6                                                                | 3.61                          | 1.25 $\pm$ 0.35                                                             | 1.11 $\pm$ 0.5                                                              | 11.16                      |
| Precuneus L           | 3.9                                                                 | 15.3                                                                | 3.92                          | 1.18 $\pm$ 0.16                                                             | 0.91 $\pm$ 0.16                                                             | 22.82                      |
| Precuneus R           | 4.3                                                                 | 16.2                                                                | 3.77                          | 1.18 $\pm$ 0.19                                                             | 0.94 $\pm$ 0.13                                                             | 20.42                      |
| Putamen L             | 4.2                                                                 | 15                                                                  | 3.57                          | 1.06 $\pm$ 0.11                                                             | 0.79 $\pm$ 0.15                                                             | 25.43                      |
| Putamen R             | 4.2                                                                 | 13.2                                                                | 3.14                          | 1.34 $\pm$ 1.57                                                             | 1.08 $\pm$ 1.22                                                             | 18.95                      |
| Rolandic Operculum L  | 3.3                                                                 | 11.7                                                                | 3.55                          | 1.22 $\pm$ 0.18                                                             | 0.93 $\pm$ 0.12                                                             | 23.69                      |
| Rolandic Operculum R  | 3.5                                                                 | 12.9                                                                | 3.69                          | 1.14 $\pm$ 0.15                                                             | 0.83 $\pm$ 0.12                                                             | 27.50                      |
| Superior Motor Area L | 6.3                                                                 | 26.5                                                                | 4.21                          | 1.46 $\pm$ 0.29                                                             | 1.02 $\pm$ 0.23                                                             | 29.77                      |
| Superior Motor Area R | 6.1                                                                 | 23.1                                                                | 3.79                          | 1.34 $\pm$ 0.3                                                              | 1.12 $\pm$ 0.23                                                             | 16.39                      |
| Temporal L            | 3                                                                   | 10.9                                                                | 3.63                          | 1.18 $\pm$ 0.11                                                             | 0.96 $\pm$ 0.09                                                             | 19.03                      |
| Temporal R            | 3.2                                                                 | 11.3                                                                | 3.53                          | 1.16 $\pm$ 0.14                                                             | 0.88 $\pm$ 0.11                                                             | 24.01                      |
| Thalamus L            | 6.3                                                                 | 18.1                                                                | 2.87                          | 1.09 $\pm$ 0.14                                                             | 0.8 $\pm$ 0.21                                                              | 26.05                      |
| Thalamus R            | 5                                                                   | 17.6                                                                | 3.52                          | 1.04 $\pm$ 0.14                                                             | 0.77 $\pm$ 0.14                                                             | 26.53                      |
| Mean $\pm$ Std. Dev.  | 16.5 $\pm$ 3                                                        | 4.5 $\pm$ 1.3                                                       | 3.7 $\pm$ 0.7                 |                                                                             |                                                                             | 23.0 $\pm$ 5.0             |

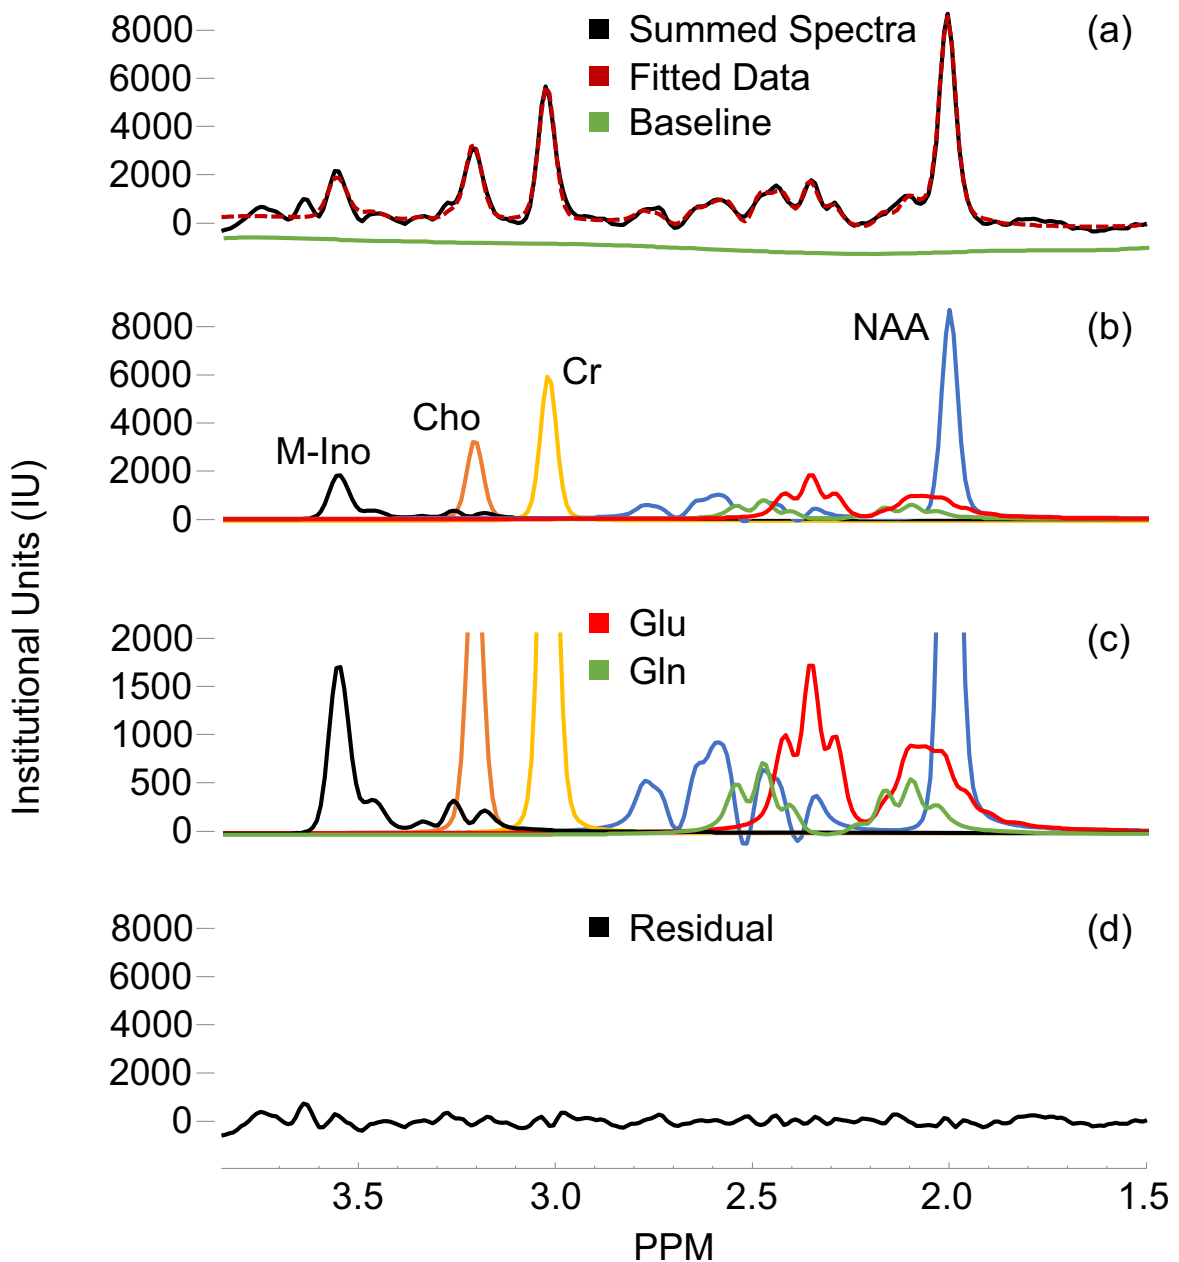

Supplementary Figure 1:

Detailed fitting results for ROI averaged spectra of the left calcarine region in Figure 1(c) showing individual basis fits. (a) Original ROI average spectra shown with fitted spectra and baseline of the fit. (b) Individual basis fitting results for NAA, Cr, Cho, myo-inositol, Glu and Gln. (c) Individual basis function fitting results focused to show details of Glu and Gln fitting. (d) Residual of the spectral fitting process.
